# Supplementary material for: Integration of HIV Care into Community Management of Acute Childhood Malnutrition Permits Good Outcomes: Retrospective Analysis of Three Years of a Programme in Lusaka
Source: PLOS journal article supplement (doi:10.1371/journal.pone.0149218), 2016-03-04
Supplement: S1 (10.1371/journal.pone.0149218.s001) [file journal.pone.0149218.s001]

**S1 Table Additional information on children who died**

|                                                   | Year Enrolled | Month Enrolled | Month/Year Died | HIV Status | On ART | Probable Cause of Death | Place Died | Additional observations |
|---------------------------------------------------|---------------|----------------|-----------------|------------|--------|-------------------------|------------|-------------------------|
| <b>SAM WITH COMPLICATIONS AND TRANSFER TO UTH</b> |               |                |                 |            |        |                         |            |                         |
| 1                                                 | 2010          | January        | Jan, 2010       | Neg        |        | SAM                     | UTH        |                         |
| 2                                                 | 2010          | March          | June, 2010      | Neg        |        | Measles                 | UTH        |                         |
| 3                                                 | 2010          | March          | May, 2010       | Pos        | Yes    | SAM                     | UTH        |                         |
| 4                                                 | 2010          | April          | Apr, 2010       | Neg        |        | SAM                     | UTH        |                         |
| 5                                                 | 2010          | April          | May, 2010       | Neg        |        | SAM                     | UTH        |                         |
| 6                                                 | 2010          | April          | May, 2010       | Neg        |        | SAM                     | UTH        |                         |
| 7                                                 | 2010          | April          | May, 2010       | Pos        | Yes    | SAM                     | UTH        |                         |
| 8                                                 | 2010          | May            | May, 2010       | Pos        | No     | SAM                     | UTH        |                         |
| 9                                                 | 2010          | May            | Jun, 2010       | Neg        |        | SAM                     | UTH        |                         |
| 10                                                | 2010          | June           | Sept, 2010      | Neg        |        | Domestic violence       | UTH        |                         |
| 11                                                | 2010          | July           | Aug, 2010       | Neg        |        | SAM                     | UTH        |                         |
| 12                                                | 2010          | July           | Oct, 2010       | Pos        | No     | SAM                     | UTH        |                         |
| 13                                                | 2010          | August         | Sept, 2010      | Pos        | Yes    | SAM                     | UTH        |                         |
| 14                                                | 2010          | October        | Nov, 2010       | Neg        |        | SAM                     | UTH        |                         |
| 15                                                | 2010          | October        | Nov, 2010       | Neg        |        | SAM                     | UTH        |                         |

|    |      |           |           |     |     |     |     |  |
|----|------|-----------|-----------|-----|-----|-----|-----|--|
| 16 | 2010 | November  | Nov, 2010 | Pos | No  | SAM | UTH |  |
| 17 | 2011 | February  | Feb, 2011 | Pos | Yes | SAM | UTH |  |
| 18 | 2011 | September | Nov, 2011 | Neg |     | SAM | UTH |  |
| 19 | 2011 | October   | Nov, 2011 | Neg |     | SAM | UTH |  |
| 20 | 2011 | November  | Mar, 2012 | Neg |     | SAM | UTH |  |
| 21 | 2011 | December  | Dec, 2011 | Neg |     | SAM | UTH |  |
| 22 | 2011 | December  | Jan, 2012 | Neg |     | SAM | UTH |  |
| 23 | 2012 | January   | Jan, 2012 | Neg |     | SAM | UTH |  |
| 24 | 2012 | January   | Mar, 2012 | Neg |     | SAM | UTH |  |
| 25 | 2012 | January   | Mar, 2012 | Pos | Yes | SAM | UTH |  |
| 26 | 2012 | May       | May, 2012 | Pos | No  | SAM | UTH |  |

**SAM WITH COMPLICATIONS AND REFUSED  
TRANSFER TO UTH**

|    |      |          |                |     |    |     |      |                              |
|----|------|----------|----------------|-----|----|-----|------|------------------------------|
| 27 | 2009 | October  | February, 2010 | Pos | No | SAM | UTH  |                              |
| 28 | 2009 | November | November, 2009 | Neg |    | SAM | Home |                              |
| 29 | 2010 | May      | June, 2010     | Pos | No | SAM | Home |                              |
| 30 | 2010 | October  | November, 2010 | Neg |    | SAM | UTH  |                              |
| 31 | 2010 | October  | December, 2010 | Pos | No | SAM | UTH  |                              |
| 32 | 2010 | December | January, 2011  | Pos | No | SAM | Home |                              |
| 33 | 2011 | April    | January, 2012  | Pos | No | SAM | Home | Mother observed selling RUTF |

|    |      |          |                |     |  |     |      |  |
|----|------|----------|----------------|-----|--|-----|------|--|
| 34 | 2011 | October  | November, 2011 | Neg |  | SAM | Home |  |
| 35 | 2011 | November | January, 2012  | Neg |  | SAM | Home |  |
| 36 | 2012 | May      | May, 2012      | Neg |  | SAM | Home |  |

# **SAM WITHOUT COMPLICATIONS**

|    |      |           |                 |          |     |                      |      |                     |
|----|------|-----------|-----------------|----------|-----|----------------------|------|---------------------|
| 37 | 2009 | November  | March, 2010     | Neg      |     | Head Injury          | UTH  |                     |
| 38 | 2010 | January   | March, 2010     | Neg      |     | Cholera-like illness | UTH  |                     |
| 39 | 2010 | March     | June, 2010      | Neg      |     | Measles              | UTH  |                     |
| 40 | 2010 | March     | May, 2010       | Pos      | Yes | SAM                  | UTH  |                     |
| 41 | 2010 | May       | June, 2010      | Neg      |     | SAM                  | Home |                     |
| 42 | 2010 | June      | July, 2010      | Neg      |     | SAM                  | Home |                     |
| 43 | 2010 | September | October, 2010   | Pos      | No  | SAM                  | Home |                     |
| 44 | 2010 | September | October, 2010   | Declined |     | SAM                  | Home |                     |
| 45 | 2010 | November  | May, 2011       | Pos      | Yes | SAM                  | UTH  |                     |
| 46 | 2011 | January   | February, 2011  | Neg      |     | SAM                  | UTH  |                     |
| 47 | 2011 | September | December, 2011  | Neg      |     | SAM                  | UTH  | Diarrhoea, vomiting |
| 48 | 2012 | February  | May, 2012       | Neg      |     | SAM                  | UTH  |                     |
| 49 | 2012 | May       | May, 2012       | Neg      |     | SAM                  | Home |                     |
| 50 | 2012 | June      | September, 2012 | Neg      |     | SAM                  | Home |                     |

# **MAM**

|    |      |          |                |     |  |             |      |  |
|----|------|----------|----------------|-----|--|-------------|------|--|
| 51 | 2009 | November | November, 2010 | Neg |  | Diarrhoea   | Home |  |
| 52 | 2010 | December | February,      | Neg |  | Diarrhoea & | UTH  |  |

|    |      |      |              |     |    |           |     |  |
|----|------|------|--------------|-----|----|-----------|-----|--|
|    |      |      | 2011         |     |    | vomiting  |     |  |
| 53 | 2011 | July | August, 2011 | Pos | No | Not clear | UTH |  |

SAM, severe acute malnutrition; MAM, moderate acute malnutrition; UTH, University Teaching Hospital; RUTF, ready-to-use therapeutic food
